# Supplementary material
Source: ML conference proceedings conference paper supplement (https://openreview.net/forum?id=XcQzXeF7fX)
Supplement: supplementary_material [file attachment]

## 1 A Detailed derivations

2 In this section, we provide detailed derivations for the Theorem and equations shown in the main text.  
 3 We follow the regularization assumptions listed in Song et al. [12].

### 4 A.1 Proof of Theorem 1

5 *Proof.* For any two timesteps  $0 \leq s < t \leq T$ , i.e., the transition probability from  $x_s$  to  $x_t$  is written  
 6 as  $q_{st}(x_t|x_s) = \mathcal{N}(x_t|\alpha_{t|s}x_s, \sigma_{t|s}^2\mathbf{I})$ , where  $\alpha_{t|s} = \frac{\alpha_t}{\alpha_s}$  and  $\sigma_{t|s}^2 = \sigma_t^2 - \alpha_{t|s}^2\sigma_s^2$ . The marginal  
 7 distribution  $q_t(x_t) = \int q_{st}(x_t|x_s)q_s(x_s)dx_s$  and we have

$$\begin{aligned}
 \nabla_{x_t} \log q_t(x_t) &= \frac{1}{\alpha_{t|s}} \nabla_{\alpha_{t|s}^{-1}x_t} \log \left( \frac{1}{\alpha_{t|s}^k} \mathbb{E}_{\mathcal{N}(x_s|\alpha_{t|s}^{-1}x_t, \alpha_{t|s}^{-2}\sigma_{t|s}^2\mathbf{I})} [q_s(x_s)] \right) \\
 &= \frac{1}{\alpha_{t|s}} \nabla_{\alpha_{t|s}^{-1}x_t} \log \left( \mathbb{E}_{\mathcal{N}(\eta|0, \alpha_{t|s}^{-2}\sigma_{t|s}^2\mathbf{I})} [q_s(\alpha_{t|s}^{-1}x_t + \eta)] \right) \\
 &= \frac{\mathbb{E}_{\mathcal{N}(\eta|0, \alpha_{t|s}^{-2}\sigma_{t|s}^2\mathbf{I})} [\nabla_{\alpha_{t|s}^{-1}x_t} q_s(\alpha_{t|s}^{-1}x_t + \eta)]}{\alpha_{t|s} \mathbb{E}_{\mathcal{N}(\eta|0, \alpha_{t|s}^{-2}\sigma_{t|s}^2\mathbf{I})} [q_s(\alpha_{t|s}^{-1}x_t + \eta)]} \\
 &= \frac{\mathbb{E}_{\mathcal{N}(\eta|0, \alpha_{t|s}^{-2}\sigma_{t|s}^2\mathbf{I})} [q_s(\alpha_{t|s}^{-1}x_t + \eta) \nabla_{\alpha_{t|s}^{-1}x_t + \eta} \log q_s(\alpha_{t|s}^{-1}x_t + \eta)]}{\alpha_{t|s} \mathbb{E}_{\mathcal{N}(\eta|0, \alpha_{t|s}^{-2}\sigma_{t|s}^2\mathbf{I})} [q_s(\alpha_{t|s}^{-1}x_t + \eta)]} \quad (1) \\
 &= \frac{\mathbb{E}_{\mathcal{N}(x_s|\alpha_{t|s}^{-1}x_t, \alpha_{t|s}^{-2}\sigma_{t|s}^2\mathbf{I})} [q_s(x_s) \nabla_{x_s} \log q_s(x_s)]}{\alpha_{t|s} \mathbb{E}_{\mathcal{N}(x_s|\alpha_{t|s}^{-1}x_t, \alpha_{t|s}^{-2}\sigma_{t|s}^2\mathbf{I})} [q_s(x_s)]} \\
 &= \frac{\int \mathcal{N}(x_t|\alpha_{t|s}x_s, \sigma_{t|s}^2\mathbf{I}) q_s(x_s) \nabla_{x_s} \log q_s(x_s) dx_s}{\alpha_{t|s} \int \mathcal{N}(x_t|\alpha_{t|s}x_s, \sigma_{t|s}^2\mathbf{I}) q_s(x_s) dx_s} \\
 &= \frac{1}{\alpha_{t|s}} \mathbb{E}_{q_{st}(x_s|x_t)} [\nabla_{x_s} \log q_s(x_s)].
 \end{aligned}$$

8 Note that when the transition probability  $q_{st}(x_t|x_s)$  corresponds to a well-defined forward  
 9 process, there is  $\alpha_t > 0$  for  $\forall t \in [0, T]$ , and thus we achieve  $\alpha_t \nabla_{x_t} \log q_t(x_t) =$   
 10  $\mathbb{E}_{q_{st}(x_s|x_t)} [\alpha_s \nabla_{x_s} \log q_s(x_s)]$ .  $\square$

### 11 A.2 Proof of $\mathbb{E}_{q_0(x_0)} [\nabla_{x_0} \log q_0(x_0)] = 0$

12 *Proof.* The input variable  $x \in \mathbb{R}^k$  and  $q_0(x_0) \in \mathcal{C}^2$ , where  $\mathcal{C}^2$  denotes the family of functions with  
 13 continuous second-order derivatives.<sup>1</sup> We use  $x^i$  denote the  $i$ -th element of  $x$ , then we can derive the  
 14 expectation

$$\begin{aligned}
 \mathbb{E}_{q_0(x_0)} \left[ \frac{\partial}{\partial x_0^i} \log q_0(x_0) \right] &= \int \cdots \int q_0(x_0) \frac{\partial}{\partial x_0^i} \log q_0(x_0) dx_0^1 dx_0^2 \cdots dx_0^k \\
 &= \int \cdots \int \frac{\partial}{\partial x_0^i} q_0(x_0) dx_0^1 dx_0^2 \cdots dx_0^k \\
 &= \int \frac{\partial}{\partial x_0^i} \left( \int q_0(x_0^i, x_0^{\setminus i}) dx_0^{\setminus i} \right) dx_0^i \quad (2) \\
 &= \int \frac{d}{dx_0^i} q_0(x_0^i) dx_0^i = 0,
 \end{aligned}$$

<sup>1</sup>This continuously differentiable assumption can be satisfied by adding a small Gaussian noise (e.g., with variance of 0.0001) on the original data distribution, as done in Song and Ermon [11].

where  $x_0^{\setminus i}$  denotes all the  $k - 1$  elements in  $x_0$  except for the  $i$ -th one. The last equation holds under the boundary condition that  $\lim_{x_0^i \rightarrow \infty} q_0(x_0^i) = 0$  hold for any  $i \in [K]$ . Thus, we achieve the conclusion that  $\mathbb{E}_{q_0(x_0)} [\nabla_{x_0} \log q_0(x_0)] = 0$ .  $\square$

### 18 A.3 Concentration bounds

19 We describe concentration bounds [2, 1] of the martingale  $\alpha_t \nabla_{x_t} \log q_t(x_t)$ .

20 **Azuma's inequality.** For discrete reverse timestep  $t = T, T - 1, \dots, 0$ , Assuming that there exist  
21 constants  $0 < c_1, c_2, \dots, < \infty$  such that for the  $i$ -th element of  $x$ ,

$$A_t \leq \frac{\partial}{\partial x_{t-1}^i} \alpha_{t-1} \log q_{t-1}(x_{t-1}) - \frac{\partial}{\partial x_t^i} \alpha_t \log q_t(x_t) \leq B_t \text{ and } B_t - A_t \leq c_t \quad (3)$$

22 almost surely. Then  $\forall \epsilon > 0$ , the probability (note that  $\alpha_0 = 1$ )

$$P \left( \left| \frac{\partial}{\partial x_0^i} \log q_0(x_0) - \frac{\partial}{\partial x_T^i} \alpha_T \log q_T(x_T) \right| \geq \epsilon \right) \leq 2 \exp \left( - \frac{2\epsilon^2}{\sum_{t=1}^T c_t^2} \right). \quad (4)$$

23 Specially, considering that  $q_T(x_T) \approx \mathcal{N}(x_T | 0, \tilde{\sigma}^2 \mathbf{I})$ , there is  $\frac{\partial}{\partial x_T^i} \log q_T(x_T) \approx -\frac{x_T^i}{\tilde{\sigma}^2}$ . Thus, we can  
24 approximately obtain

$$P \left( \left| \frac{\partial}{\partial x_0^i} \log q_0(x_0) + \frac{\alpha_T x_T^i}{\tilde{\sigma}^2} \right| \geq \epsilon \right) \leq 2 \exp \left( - \frac{2\epsilon^2}{\sum_{t=1}^T c_t^2} \right). \quad (5)$$

25 **Doob's inequality.** For continuous reverse timestep  $t$  from  $T$  to 0, if the sample paths of the  
26 martingale are almost surely right-continuous, then for the  $i$ -th element of  $x$  we have (note that  
27  $\alpha_0 = 1$ )

$$P \left( \sup_{0 \leq t \leq T} \frac{\partial}{\partial x_t^i} \alpha_t \log q_t(x_t) \geq C \right) \leq \frac{\mathbb{E}_{q_0(x_0)} \left[ \max \left( \frac{\partial}{\partial x_0^i} \log q_0(x_0), 0 \right) \right]}{C}. \quad (6)$$

### 28 A.4 High-order SM objectives

29 Lu et al. [6] show that the KL divergence  $\mathcal{D}_{\text{KL}}(q_0 \| p_0^{\text{ODE}}(\theta))$  can be bounded as

$$\mathcal{D}_{\text{KL}}(q_0 \| p_0^{\text{ODE}}(\theta)) \leq \mathcal{D}_{\text{KL}}(q_T \| p_T) + \sqrt{\mathcal{J}_{\text{SM}}(\theta; g(t)^2)} \cdot \sqrt{\mathcal{J}_{\text{Fisher}}(\theta)}, \quad (7)$$

30 where  $\mathcal{J}_{\text{Fisher}}(\theta)$  is a weighted sum of Fisher divergence between  $q_t(x_t)$  and  $p_t^{\text{ODE}}(\theta)$  as

$$\mathcal{J}_{\text{Fisher}}(\theta) = \frac{1}{2} \int_0^T g(t)^2 D_F(q_t \| p_t^{\text{ODE}}(\theta)) dt. \quad (8)$$

31 Moreover, Lu et al. [6] prove that if  $\forall t \in [0, T]$  and  $\forall x_t \in \mathbb{R}^k$ , there exist a constant  $C_F$  such that the  
32 spectral norm of Hessian matrix  $\|\nabla_{x_t}^2 \log p_t^{\text{ODE}}(x_t; \theta)\|_2 \leq C_F$ , and there exist  $\delta_1, \delta_2, \delta_3 > 0$  such  
33 that

$$\begin{aligned} \|\mathbf{s}_\theta^t(x_t) - \nabla_{x_t} \log q_t(x_t)\|_2 &\leq \delta_1, \\ \|\nabla_{x_t} \mathbf{s}_\theta^t(x_t) - \nabla_{x_t}^2 \log q_t(x_t)\|_F &\leq \delta_2, \\ \|\nabla_{x_t} \mathbf{tr}(\nabla_{x_t} \mathbf{s}_\theta^t(x_t)) - \nabla_{x_t} \mathbf{tr}(\nabla_{x_t}^2 \log q_t(x_t))\|_2 &\leq \delta_3, \end{aligned} \quad (9)$$

34 where  $\|\cdot\|_F$  is the Frobenius norm of matrix. Then there exist a function  $U(t; \delta_1, \delta_2, \delta_3, q)$  that  
35 independent of  $\theta$  and strictly increasing (if  $g(t) \neq 0$ ) w.r.t.  $\delta_1, \delta_2$ , and  $\delta_3$ , respectively, such that the  
36 Fisher divergence can be bounded as  $D_F(q_t \| p_t^{\text{ODE}}(\theta)) \leq U(t; \delta_1, \delta_2, \delta_3, q)$ .

37 **The case after calibration.** When we impose the calibration term  $\eta_t^* = \mathbb{E}_{q_t(x_t)} [\mathbf{s}_\theta^t(x_t)]$  to get the  
38 score model  $\mathbf{s}_\theta^t(x_t) - \eta_t^*$ , there is  $\nabla_{x_t} \eta_t^* = 0$  and thus  $\nabla_{x_t} (\mathbf{s}_\theta^t(x_t) - \eta_t^*) = \nabla_{x_t} \mathbf{s}_\theta^t(x_t)$ . Then we  
39 have

$$\begin{aligned} \|\mathbf{s}_\theta^t(x_t) - \eta_t^* - \nabla_{x_t} \log q_t(x_t)\|_2 &\leq \delta'_1 \leq \delta_1, \\ \|\nabla_{x_t} (\mathbf{s}_\theta^t(x_t) - \eta_t^*) - \nabla_{x_t}^2 \log q_t(x_t)\|_F &\leq \delta_2, \\ \|\nabla_{x_t} \mathbf{tr}(\nabla_{x_t} (\mathbf{s}_\theta^t(x_t) - \eta_t^*)) - \nabla_{x_t} \mathbf{tr}(\nabla_{x_t}^2 \log q_t(x_t))\|_2 &\leq \delta_3. \end{aligned} \quad (10)$$

From these, we know that the Fisher divergence  $D_F(q_t \| p_t^{\text{ODE}}(\theta, \eta_t^*)) \leq U(t; \delta'_1, \delta_2, \delta_3, q) \leq U(t; \delta_1, \delta_2, \delta_3, q)$ , namely,  $D_F(q_t \| p_t^{\text{ODE}}(\theta, \eta_t^*))$  has a lower upper bound compared to  $D_F(q_t \| p_t^{\text{ODE}}(\theta))$ . Consequently, we can get lower upper bounds for both  $\mathcal{J}_{\text{Fisher}}(\theta, \eta_t^*)$  and  $\mathcal{D}_{\text{KL}}(q_0 \| p_0^{\text{ODE}}(\theta, \eta_t^*))$ , compared to  $\mathcal{J}_{\text{Fisher}}(\theta)$  and  $\mathcal{D}_{\text{KL}}(q_0 \| p_0^{\text{ODE}}(\theta))$ , respectively.

## B Model parametrization

This section introduces different parametrizations used in diffusion models and provides their calibrated instantiations.

### B.1 Preliminary

Along the research routine of diffusion models, different model parametrizations have been used, including score prediction  $\mathbf{s}_\theta^t(x_t)$  [11, 13], noise prediction  $\epsilon_\theta^t(x_t)$  [3, 8], data prediction  $\mathbf{x}_\theta^t(x_t)$  [5, 7], and velocity prediction  $\mathbf{v}_\theta^t(x_t)$  [9, 4]. Taking the DSM objective as the training loss, its instantiation at timestep  $t \in [0, T]$  is written as

$$\mathcal{J}_{\text{DSM}}^t(\theta) = \begin{cases} \frac{1}{2} \mathbb{E}_{q_0(x_0), q(\epsilon)} [\|\mathbf{s}_\theta^t(x_t) + \frac{\epsilon}{\sigma_t}\|_2^2], & \text{score prediction;} \\ \frac{\alpha_t^2}{2\sigma_t^4} \mathbb{E}_{q_0(x_0), q(\epsilon)} [\|\mathbf{x}_\theta^t(x_t) - x_0\|_2^2], & \text{data prediction;} \\ \frac{1}{2\sigma_t^2} \mathbb{E}_{q_0(x_0), q(\epsilon)} [\|\epsilon_\theta^t(x_t) - \epsilon\|_2^2], & \text{noise prediction;} \\ \frac{\alpha_t^2}{2\sigma_t^2} \mathbb{E}_{q_0(x_0), q(\epsilon)} [\|\mathbf{v}_\theta^t(x_t) - (\alpha_t \epsilon - \sigma_t x_0)\|_2^2], & \text{velocity prediction.} \end{cases} \quad (11)$$

### B.2 Calibrated instantiation

Under different model parametrizations, we can derive the optimal calibration terms  $\eta_t^*$  that minimizing  $\mathcal{J}_{\text{DSM}}^t(\theta, \eta_t)$  as

$$\eta_t^* = \begin{cases} \mathbb{E}_{q_t(x_t)} [\mathbf{s}_\theta^t(x_t)], & \text{score prediction;} \\ \mathbb{E}_{q_t(x_t)} [\mathbf{x}_\theta^t(x_t)] - \mathbb{E}_{q_0(x_0)} [x_0], & \text{data prediction;} \\ \mathbb{E}_{q_t(x_t)} [\epsilon_\theta^t(x_t)], & \text{noise prediction;} \\ \mathbb{E}_{q_t(x_t)} [\mathbf{v}_\theta^t(x_t)] + \sigma_t \mathbb{E}_{q_0(x_0)} [x_0], & \text{velocity prediction.} \end{cases} \quad (12)$$

Taking  $\eta_t^*$  into  $\mathcal{J}_{\text{DSM}}^t(\theta, \eta_t)$  we can obtain the gap

$$\mathcal{J}_{\text{DSM}}^t(\theta) - \mathcal{J}_{\text{DSM}}^t(\theta, \eta_t^*) = \begin{cases} \frac{1}{2} \|\mathbb{E}_{q_t(x_t)} [\mathbf{s}_\theta^t(x_t)]\|_2^2, & \text{score prediction;} \\ \frac{\alpha_t^2}{2\sigma_t^4} \|\mathbb{E}_{q_t(x_t)} [\mathbf{x}_\theta^t(x_t)] - \mathbb{E}_{q_0(x_0)} [x_0]\|_2^2, & \text{data prediction;} \\ \frac{1}{2\sigma_t^2} \|\mathbb{E}_{q_t(x_t)} [\epsilon_\theta^t(x_t)]\|_2^2, & \text{noise prediction;} \\ \frac{\alpha_t^2}{2\sigma_t^2} \|\mathbb{E}_{q_t(x_t)} [\mathbf{v}_\theta^t(x_t)] + \sigma_t \mathbb{E}_{q_0(x_0)} [x_0]\|_2^2, & \text{velocity prediction.} \end{cases} \quad (13)$$

## C Visualization of the generations

We further show generated images in Figure 1 to double confirm the efficacy of our calibration method. Our calibration could help to reduce ambiguous generations on both CIFAR-10 and CelebA.

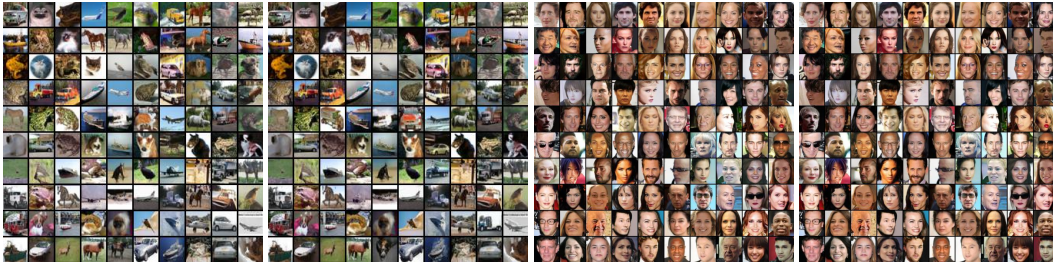

(a) CIFAR-10, w/ calibration (b) CIFAR-10, w/o calibration (c) CelebA, w/ calibration (d) CelebA, w/o calibration

Figure 1: Unconditional generation results on CIFAR-10 and CelebA using models from [3] and [10] respectively. The number of sampling steps is 20 based on the results in Tables 1 and 2.

## References

- [1] Kazuoki Azuma. Weighted sums of certain dependent random variables. *Tohoku Mathematical Journal, Second Series*, 19(3):357–367, 1967.
- [2] Joseph L Doob and Joseph L Doob. *Stochastic processes*, volume 7. Wiley New York, 1953.
- [3] Jonathan Ho, Ajay Jain, and Pieter Abbeel. Denoising diffusion probabilistic models. In *Advances in Neural Information Processing Systems (NeurIPS)*, 2020.
- [4] Jonathan Ho, William Chan, Chitwan Saharia, Jay Whang, Ruiqi Gao, Alexey Gritsenko, Diederik P Kingma, Ben Poole, Mohammad Norouzi, David J Fleet, et al. Imagen video: High definition video generation with diffusion models. *arXiv preprint arXiv:2210.02303*, 2022.
- [5] Diederik Kingma, Tim Salimans, Ben Poole, and Jonathan Ho. Variational diffusion models. In *Advances in Neural Information Processing Systems (NeurIPS)*, 2021.
- [6] Cheng Lu, Kaiwen Zheng, Fan Bao, Jianfei Chen, Chongxuan Li, and Jun Zhu. Maximum likelihood training for score-based diffusion odes by high order denoising score matching. In *International Conference on Machine Learning (ICML)*, 2022.
- [7] Aditya Ramesh, Prafulla Dhariwal, Alex Nichol, Casey Chu, and Mark Chen. Hierarchical text-conditional image generation with clip latents. *arXiv preprint arXiv:2204.06125*, 2022.
- [8] Robin Rombach, Andreas Blattmann, Dominik Lorenz, Patrick Esser, and Björn Ommer. High-resolution image synthesis with latent diffusion models. In *IEEE Conference on Computer Vision and Pattern Recognition (CVPR)*, 2022.
- [9] Tim Salimans and Jonathan Ho. Progressive distillation for fast sampling of diffusion models. In *International Conference on Learning Representations (ICLR)*, 2022.
- [10] Jiaming Song, Chenlin Meng, and Stefano Ermon. Denoising diffusion implicit models. In *International Conference on Learning Representations (ICLR)*, 2021.
- [11] Yang Song and Stefano Ermon. Generative modeling by estimating gradients of the data distribution. In *Advances in Neural Information Processing Systems (NeurIPS)*, pages 11895–11907, 2019.
- [12] Yang Song, Conor Durkan, Iain Murray, and Stefano Ermon. Maximum likelihood training of score-based diffusion models. In *Advances in Neural Information Processing Systems (NeurIPS)*, 2021.
- [13] Yang Song, Jascha Sohl-Dickstein, Diederik P Kingma, Abhishek Kumar, Stefano Ermon, and Ben Poole. Score-based generative modeling through stochastic differential equations. In *International Conference on Learning Representations (ICLR)*, 2021.
